# Supplementary material for: Factors associated with medical student clinical reasoning and evidence based medicine practice
Source: PubMed Central journal article supplement (PMC4646359; doi:10.5116/ijme.563a.5dd0), 2015-11-08
Supplement: ijme-6-142-S1.pdf [file ijme-6-142-S1.pdf]

## Appendix 1

### Clinical Reasoning and Evidence-Based Medicine Experiences Survey

Dear Student,

We would like to understand your Singapore clinical learning environment. This information will help us refine our courses to better meet your needs.

Thank you for taking the survey and providing us with your input regarding the questions.

1. Think about your experience during Practice Course 4 and rate the extent to which you agree with the following:

| Item                                                                                                       | 1                     | 2                     | 3                     | 4                     | 5                     |
|------------------------------------------------------------------------------------------------------------|-----------------------|-----------------------|-----------------------|-----------------------|-----------------------|
| I actively thought through clinical cases presented in class.                                              | <input type="radio"/> | <input type="radio"/> | <input type="radio"/> | <input type="radio"/> | <input type="radio"/> |
| I was exposed to different systematic approaches to reasoning through clinical cases in class.             | <input type="radio"/> | <input type="radio"/> | <input type="radio"/> | <input type="radio"/> | <input type="radio"/> |
| I practiced using systematic approaches to reasoning through cases in class.                               | <input type="radio"/> | <input type="radio"/> | <input type="radio"/> | <input type="radio"/> | <input type="radio"/> |
| I practiced using the current medical literature to answer clinical questions that arose during the class. | <input type="radio"/> | <input type="radio"/> | <input type="radio"/> | <input type="radio"/> | <input type="radio"/> |

2. Think about your experiences in your Fourth Year of medical school while on Singapore clinical rotations. Please rate the extent to which you agree with the following:

| Item                                                                                           | 1                     | 2                     | 3                     | 4                     | 5                     |
|------------------------------------------------------------------------------------------------|-----------------------|-----------------------|-----------------------|-----------------------|-----------------------|
| I reasoned through cases more effectively.                                                     | <input type="radio"/> | <input type="radio"/> | <input type="radio"/> | <input type="radio"/> | <input type="radio"/> |
| I took better care of patients.                                                                | <input type="radio"/> | <input type="radio"/> | <input type="radio"/> | <input type="radio"/> | <input type="radio"/> |
| I used the current medical literature to answer clinical questions that arose for my patients. | <input type="radio"/> | <input type="radio"/> | <input type="radio"/> | <input type="radio"/> | <input type="radio"/> |

3. Think about your most common experiences in Singapore for your 4th year clinical rotations.

Please rate the extent to which you agree with the following:

| Item                                                                                           | 1                     | 2                     | 3                     | 4                     | 5                     |
|------------------------------------------------------------------------------------------------|-----------------------|-----------------------|-----------------------|-----------------------|-----------------------|
| I used a systematic approach to reason through my patients' case.                              | <input type="radio"/> | <input type="radio"/> | <input type="radio"/> | <input type="radio"/> | <input type="radio"/> |
| I used the current medical literature to answer clinical questions that arose for my patients. | <input type="radio"/> | <input type="radio"/> | <input type="radio"/> | <input type="radio"/> | <input type="radio"/> |

4. Please rate the extent to which you agree with the following:

| Item                                                                                                  | 1                     | 2                     | 3                     | 4                     | 5                     |
|-------------------------------------------------------------------------------------------------------|-----------------------|-----------------------|-----------------------|-----------------------|-----------------------|
| I value systematic approach to reasoning for exemplary patient care.                                  | <input type="radio"/> | <input type="radio"/> | <input type="radio"/> | <input type="radio"/> | <input type="radio"/> |
| I value using the current medical literature to answer clinical questions for exemplary patient care. | <input type="radio"/> | <input type="radio"/> | <input type="radio"/> | <input type="radio"/> | <input type="radio"/> |
| This course adds value to my clinical training.                                                       | <input type="radio"/> | <input type="radio"/> | <input type="radio"/> | <input type="radio"/> | <input type="radio"/> |

5. Think about your most common 4th year clinical rotations in Singapore and the consultant supervisors who were in charge of your clinical educational experience and patient care. From your perspective, please rate the extent to which you agree with the following:

| Item                                                                                      | 1                     | 2                     | 3                     | 4                     | 5                     |
|-------------------------------------------------------------------------------------------|-----------------------|-----------------------|-----------------------|-----------------------|-----------------------|
| Uses the current medical literature to answer clinical questions that arise for patients. | <input type="radio"/> | <input type="radio"/> | <input type="radio"/> | <input type="radio"/> | <input type="radio"/> |
| Uses a systematic approach to reason through patients' cases.                             | <input type="radio"/> | <input type="radio"/> | <input type="radio"/> | <input type="radio"/> | <input type="radio"/> |
| Values using a systematic approach to reasoning through cases for exemplary patient care. | <input type="radio"/> | <input type="radio"/> | <input type="radio"/> | <input type="radio"/> | <input type="radio"/> |
| Values using the current medical literature to make decisions for exemplary patient care. | <input type="radio"/> | <input type="radio"/> | <input type="radio"/> | <input type="radio"/> | <input type="radio"/> |
| Teaches me how to use the current medical literature to answer clinical questions.        | <input type="radio"/> | <input type="radio"/> | <input type="radio"/> | <input type="radio"/> | <input type="radio"/> |
| Teaches me how to systematically reason through patients' cases.                          | <input type="radio"/> | <input type="radio"/> | <input type="radio"/> | <input type="radio"/> | <input type="radio"/> |

6. Scenario

You are on a clinical rotation in Singapore. Think of your most common experience.

You are caring for a patient with your team members whose treatment plan is under discussion.

Ultimately, the consultant makes a decision on the treatment plan.

| Item                                                                                                      | 1                     | 2                     | 3                     | 4                     | 5                     |
|-----------------------------------------------------------------------------------------------------------|-----------------------|-----------------------|-----------------------|-----------------------|-----------------------|
| How likely is it that the consultant will fully explain his/her thinking process for this decision?       | <input type="radio"/> | <input type="radio"/> | <input type="radio"/> | <input type="radio"/> | <input type="radio"/> |
| How likely is it that the consultant will look to the current medical literature to inform this decision? | <input type="radio"/> | <input type="radio"/> | <input type="radio"/> | <input type="radio"/> | <input type="radio"/> |

7. You do a literature search and find an article that could inform the treatment decision.

| Item                                                                             | 1                     | 2                     | 3                     | 4                     | 5                     |
|----------------------------------------------------------------------------------|-----------------------|-----------------------|-----------------------|-----------------------|-----------------------|
| How likely is it that this will be appreciated by the consultant?                | <input type="radio"/> | <input type="radio"/> | <input type="radio"/> | <input type="radio"/> | <input type="radio"/> |
| How likely is it that this will be appreciated by your resident/medical officer? | <input type="radio"/> | <input type="radio"/> | <input type="radio"/> | <input type="radio"/> | <input type="radio"/> |
| How likely is it that this will be appreciated by your intern/house officer?     | <input type="radio"/> | <input type="radio"/> | <input type="radio"/> | <input type="radio"/> | <input type="radio"/> |
